# Supplementary material for: All-trans retinoic acid and rapamycin normalize Hutchinson Gilford progeria fibroblast phenotype
Source: PubMed Central journal article supplement (PMC4745772; doi:10.18632/oncotarget.4939), 2015-08-13
Supplement: oncotarget-06-29914-s001.pdf [file oncotarget-06-29914-s001.pdf]

## SUPPLEMENTARY FIGURES

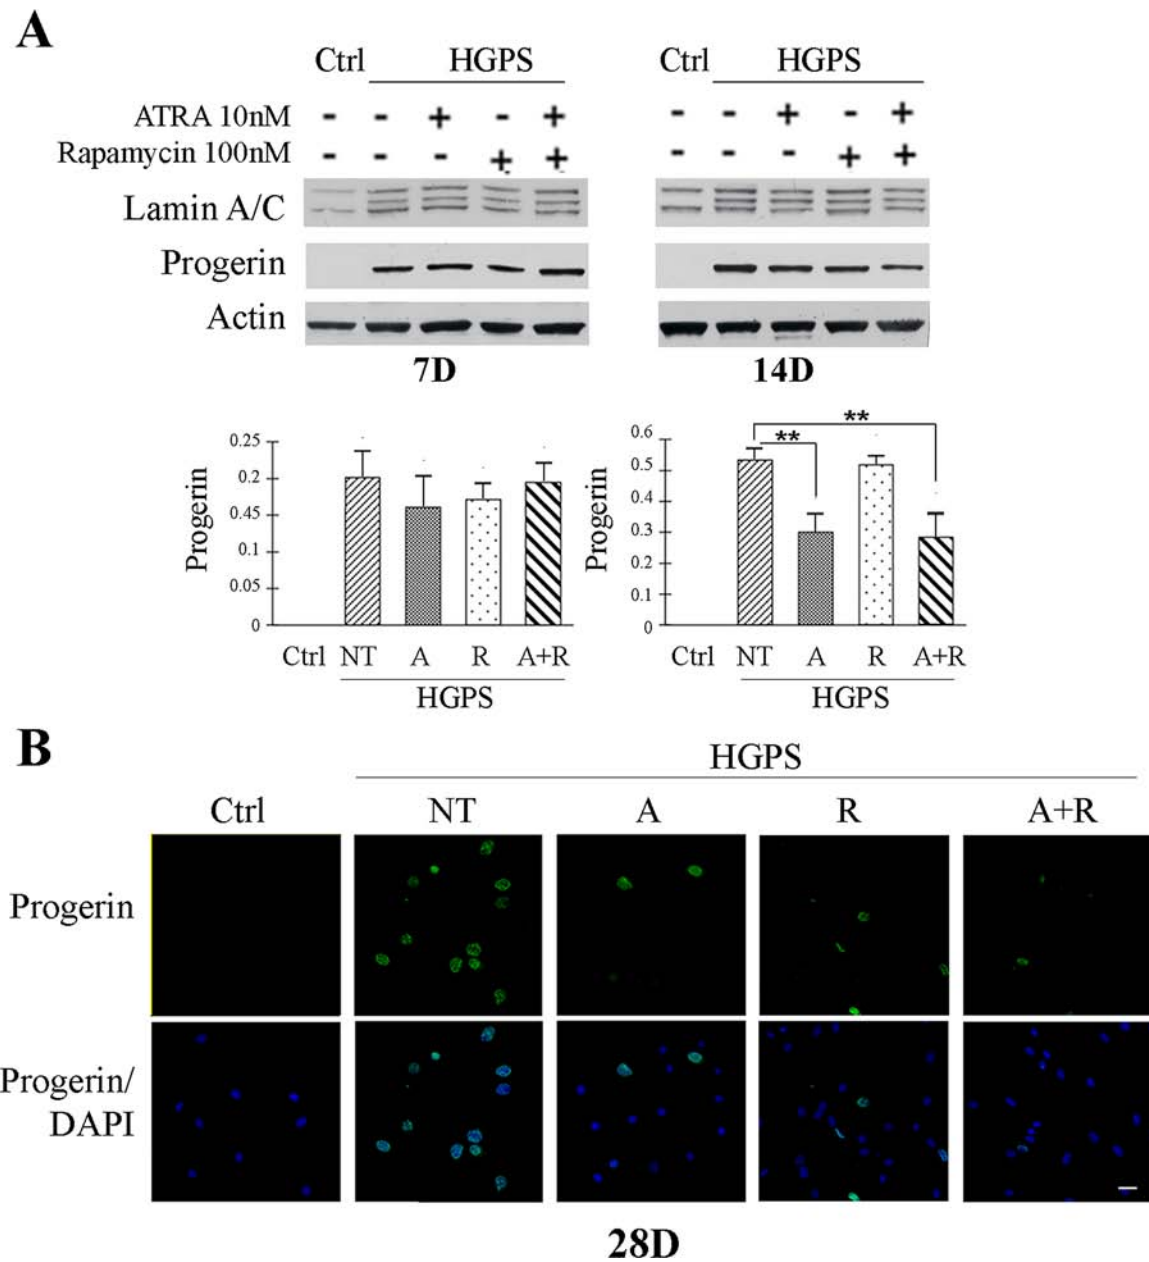

**Supplementary Figure S1: A. Treatment effect at different time points.** Western blotting analysis of progerin and lamin A/C and relative densitometric quantification at 7 and 14 days of treatment. Actin is used as loading control. Data are presented as means  $\pm$  SD ( $n = 3$ );  $P = 0.01(**)$ . **B.** Low magnification figure 1B. Immunofluorescence analysis of progerin (green) at 28 days of treatment. DAPI is used as nuclear staining. Scale bar, 10  $\mu$ M. Ctrl: Healthy fibroblasts; NT: not treated HGPS fibroblasts; A, R and A+R: HGPS fibroblasts treated with ATRA, rapamycin and combined ATRA + rapamycin respectively.

**A**

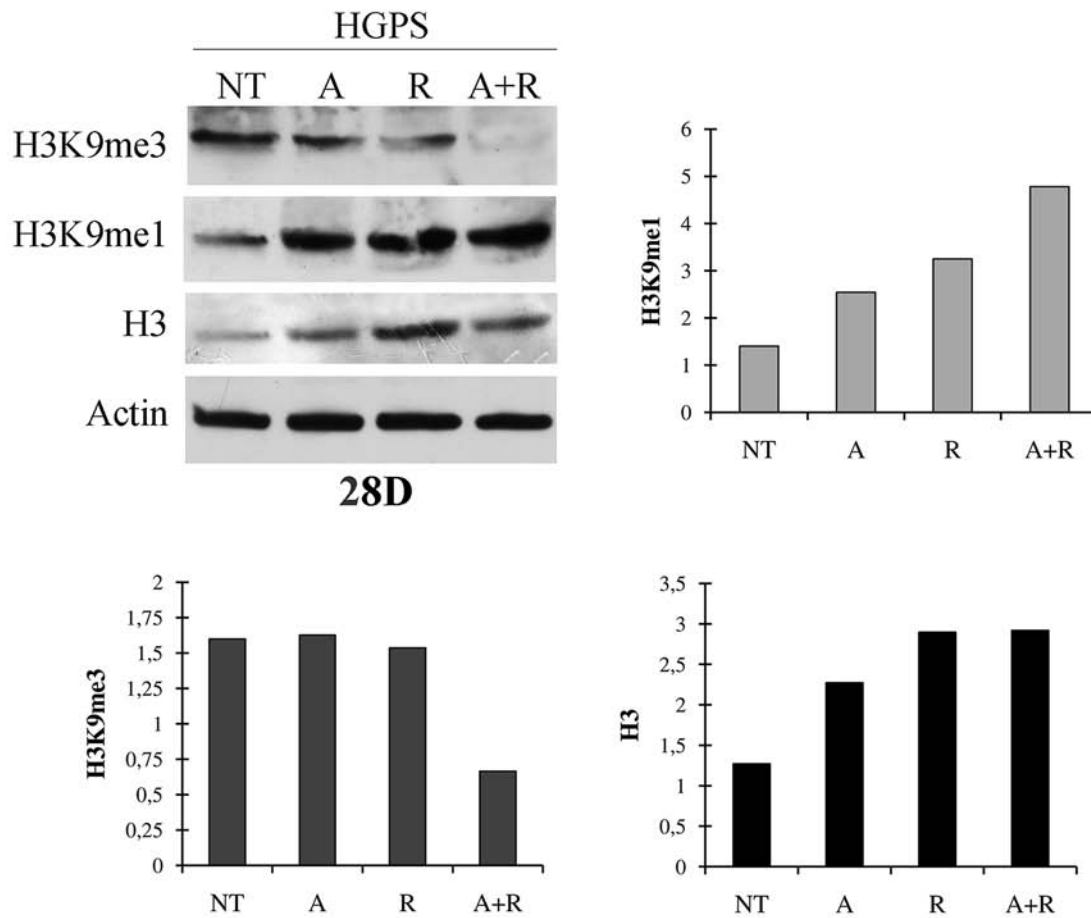

**B**

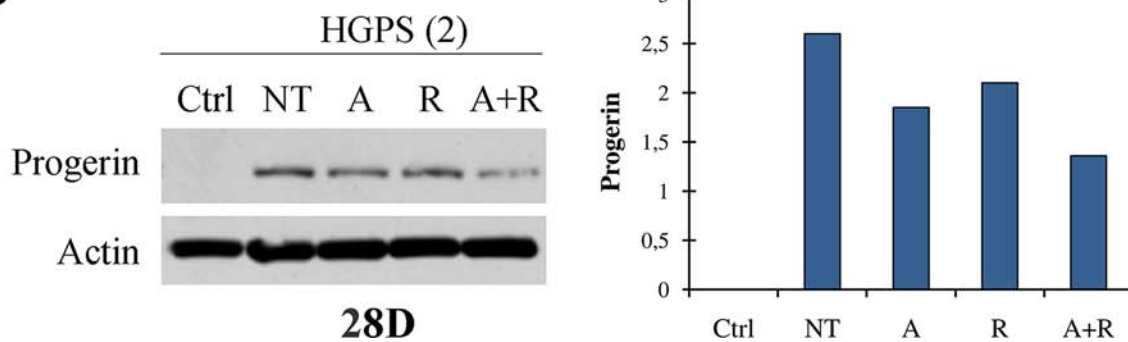

**Supplementary Figure S2: A.** Western blot analysis of H3K9 (tri-methylated and mono-methylated) and total H3, in untreated (NT) and treated (28 days) HGPS nuclei. A, R and A+R: HGPS fibroblasts treated with ATRA, rapamycin and combined ATRA + rapamycin respectively. **B.** Western blotting analysis of progerin and lamin A/C replicated in cultured fibroblasts from a second HGPS patient.
